# Supplementary material
Source: publisher figshare collection journal article supplement (https://gsajournals.figshare.com/ndownloader/files/12776402)
Supplement: Supplementary file 1 [file 12776402]

Table S8. Output data for the Sanzi by Vita 7 population
SNP	Chromosome	cM	LOD
2_19235	1	0	0.094305594
2_28392	1	0	0.094305594
2_28393	1	0	0.094305594
2_29021	1	0	0.094305594
2_34231	1	0	0.094305594
1_0052	1	0.416	0.05161658
1_0054	1	0.416	0.05161658
1_0364	1	0.416	0.05161658
2_03903	1	0.416	0.05161658
2_03904	1	0.416	0.05161658
2_05939	1	0.416	0.05161658
2_06814	1	0.416	0.05161658
2_07404	1	0.416	0.05161658
2_10341	1	0.416	0.05161658
2_10342	1	0.416	0.05161658
2_10941	1	0.416	0.05161658
2_11058	1	0.416	0.05161658
2_11059	1	0.416	0.05161658
2_12557	1	0.416	0.05161658
2_15094	1	0.416	0.05161658
2_15686	1	0.416	0.05161658
2_15687	1	0.416	0.05161658
2_15984	1	0.416	0.05161658
2_15985	1	0.416	0.05161658
2_16623	1	0.416	0.05161658
2_16624	1	0.416	0.05161658
2_18717	1	0.416	0.05161658
2_18842	1	0.416	0.05161658
2_19281	1	0.416	0.05161658
2_19475	1	0.416	0.05161658
2_19545	1	0.416	0.05161658
2_20998	1	0.416	0.05161658
2_23726	1	0.416	0.05161658
2_23727	1	0.416	0.05161658
2_23877	1	0.416	0.05161658
2_25695	1	0.416	0.05161658
2_26938	1	0.416	0.05161658
2_26939	1	0.416	0.05161658
2_27247	1	0.416	0.05161658
2_28672	1	0.416	0.05161658
2_28734	1	0.416	0.05161658
2_29788	1	0.416	0.05161658
2_29974	1	0.416	0.05161658
2_30746	1	0.416	0.05161658
2_30940	1	0.416	0.05161658
2_31763	1	0.416	0.05161658
2_32941	1	0.416	0.05161658
2_33997	1	0.416	0.05161658
2_34702	1	0.416	0.05161658
2_34703	1	0.416	0.05161658
2_45250	1	0.416	0.05161658
2_46478	1	0.416	0.05161658
2_47829	1	0.416	0.05161658
2_49887	1	0.416	0.05161658
2_51363	1	0.416	0.05161658
2_52089	1	0.416	0.05161658
2_53453	1	0.416	0.05161658
2_53971	1	0.416	0.05161658
2_55126	1	0.416	0.05161658
2_55330	1	0.416	0.05161658
2_11400	1	0.833	0.021301299
2_13585	1	0.833	0.021301299
2_22800	1	1.673	0.002314243
2_25769	1	1.673	0.002314243
2_28136	1	1.673	0.002314243
2_34924	1	1.673	0.002314243
2_34929	1	1.673	0.002314243
2_35674	1	1.673	0.002314243
2_35675	1	1.673	0.002314243
2_36435	1	1.673	0.002314243
2_36502	1	1.673	0.002314243
1_0456	1	3.83	0.136968079
2_08212	1	5.101	0.015237774
2_09059	1	5.101	0.015237774
2_13005	1	5.101	0.015237774
2_13006	1	5.101	0.015237774
2_38500	1	5.101	0.015237774
2_38501	1	5.101	0.015237774
2_49840	1	5.101	0.015237774
2_01275	1	5.518	0.001925842
2_01276	1	5.518	0.001925842
2_04232	1	5.518	0.001925842
2_04233	1	5.518	0.001925842
2_07793	1	5.518	0.001925842
2_07794	1	5.518	0.001925842
2_13991	1	5.518	0.001925842
2_14636	1	5.518	0.001925842
2_14637	1	5.518	0.001925842
2_19683	1	5.518	0.001925842
2_21242	1	5.518	0.001925842
2_21243	1	5.518	0.001925842
2_23210	1	5.518	0.001925842
2_23211	1	5.518	0.001925842
2_28811	1	5.518	0.001925842
2_28812	1	5.518	0.001925842
2_29605	1	5.518	0.001925842
2_29606	1	5.518	0.001925842
2_53093	1	5.518	0.001925842
2_54024	1	5.518	0.001925842
1_0397	1	5.935	0.021715701
2_00853	1	5.935	0.021715701
2_00854	1	5.935	0.021715701
2_01723	1	5.935	0.021715701
2_01724	1	5.935	0.021715701
2_01725	1	5.935	0.021715701
2_09654	1	5.935	0.021715701
2_10195	1	5.935	0.021715701
2_10725	1	5.935	0.021715701
2_10738	1	5.935	0.021715701
2_10739	1	5.935	0.021715701
2_14067	1	5.935	0.021715701
2_14259	1	5.935	0.021715701
2_14260	1	5.935	0.021715701
2_14633	1	5.935	0.021715701
2_15024	1	5.935	0.021715701
2_17017	1	5.935	0.021715701
2_19299	1	5.935	0.021715701
2_19300	1	5.935	0.021715701
2_20801	1	5.935	0.021715701
2_20802	1	5.935	0.021715701
2_21656	1	5.935	0.021715701
2_21657	1	5.935	0.021715701
2_22371	1	5.935	0.021715701
2_22372	1	5.935	0.021715701
2_23269	1	5.935	0.021715701
2_23270	1	5.935	0.021715701
2_25175	1	5.935	0.021715701
2_25199	1	5.935	0.021715701
2_25200	1	5.935	0.021715701
2_25201	1	5.935	0.021715701
2_28605	1	5.935	0.021715701
2_29712	1	5.935	0.021715701
2_29713	1	5.935	0.021715701
2_29770	1	5.935	0.021715701
2_29771	1	5.935	0.021715701
2_30402	1	5.935	0.021715701
2_33373	1	5.935	0.021715701
2_38594	1	5.935	0.021715701
2_38595	1	5.935	0.021715701
2_38919	1	5.935	0.021715701
2_38920	1	5.935	0.021715701
2_40856	1	5.935	0.021715701
2_41598	1	5.935	0.021715701
2_42833	1	5.935	0.021715701
2_43947	1	5.935	0.021715701
2_45668	1	5.935	0.021715701
2_46207	1	5.935	0.021715701
2_47368	1	5.935	0.021715701
2_48294	1	5.935	0.021715701
2_48769	1	5.935	0.021715701
2_50535	1	5.935	0.021715701
2_53014	1	5.935	0.021715701
2_54619	1	5.935	0.021715701
1_0321	1	6.351	0.051572414
2_00218	1	6.351	0.051572414
2_01267	1	6.351	0.051572414
2_03799	1	6.351	0.051572414
2_05278	1	6.351	0.051572414
2_06640	1	6.351	0.051572414
2_07252	1	6.351	0.051572414
2_07253	1	6.351	0.051572414
2_09081	1	6.351	0.051572414
2_10365	1	6.351	0.051572414
2_10366	1	6.351	0.051572414
2_10395	1	6.351	0.051572414
2_10396	1	6.351	0.051572414
2_10970	1	6.351	0.051572414
2_11202	1	6.351	0.051572414
2_11203	1	6.351	0.051572414
2_11204	1	6.351	0.051572414
2_11205	1	6.351	0.051572414
2_12302	1	6.351	0.051572414
2_12303	1	6.351	0.051572414
2_16818	1	6.351	0.051572414
2_16819	1	6.351	0.051572414
2_18767	1	6.351	0.051572414
2_18875	1	6.351	0.051572414
2_21016	1	6.351	0.051572414
2_21017	1	6.351	0.051572414
2_23706	1	6.351	0.051572414
2_23707	1	6.351	0.051572414
2_24533	1	6.351	0.051572414
2_27189	1	6.351	0.051572414
2_30985	1	6.351	0.051572414
2_30986	1	6.351	0.051572414
2_32211	1	6.351	0.051572414
2_32648	1	6.351	0.051572414
2_38420	1	6.351	0.051572414
2_38585	1	6.351	0.051572414
2_38586	1	6.351	0.051572414
2_39527	1	6.351	0.051572414
2_40201	1	6.351	0.051572414
2_41024	1	6.351	0.051572414
2_44347	1	6.351	0.051572414
2_50341	1	6.351	0.051572414
2_50498	1	6.351	0.051572414
2_51110	1	6.351	0.051572414
2_52976	1	6.351	0.051572414
2_53074	1	6.351	0.051572414
2_53295	1	6.351	0.051572414
2_53647	1	6.351	0.051572414
2_54271	1	6.351	0.051572414
1_0314	1	6.768	0.021715701
1_0969	1	6.768	0.021715701
2_02576	1	6.768	0.021715701
2_02577	1	6.768	0.021715701
2_02578	1	6.768	0.021715701
2_05550	1	6.768	0.021715701
2_05551	1	6.768	0.021715701
2_07796	1	6.768	0.021715701
2_14328	1	6.768	0.021715701
2_14329	1	6.768	0.021715701
2_19569	1	6.768	0.021715701
2_27626	1	6.768	0.021715701
2_30699	1	6.768	0.021715701
2_33374	1	6.768	0.021715701
2_46701	1	6.768	0.021715701
2_49167	1	6.768	0.021715701
2_49211	1	6.768	0.021715701
2_55488	1	6.768	0.021715701
1_0976	1	7.608	0.021715701
2_00103	1	7.608	0.021715701
2_00104	1	7.608	0.021715701
2_03167	1	7.608	0.021715701
2_03168	1	7.608	0.021715701
2_03583	1	7.608	0.021715701
2_04259	1	7.608	0.021715701
2_08036	1	7.608	0.021715701
2_09080	1	7.608	0.021715701
2_09277	1	7.608	0.021715701
2_09278	1	7.608	0.021715701
2_11378	1	7.608	0.021715701
2_11379	1	7.608	0.021715701
2_12168	1	7.608	0.021715701
2_14286	1	7.608	0.021715701
2_14287	1	7.608	0.021715701
2_16948	1	7.608	0.021715701
2_18817	1	7.608	0.021715701
2_19287	1	7.608	0.021715701
2_19288	1	7.608	0.021715701
2_20957	1	7.608	0.021715701
2_23742	1	7.608	0.021715701
2_25593	1	7.608	0.021715701
2_25594	1	7.608	0.021715701
2_25938	1	7.608	0.021715701
2_25939	1	7.608	0.021715701
2_29314	1	7.608	0.021715701
2_39085	1	7.608	0.021715701
2_44219	1	7.608	0.021715701
2_45726	1	7.608	0.021715701
2_45826	1	7.608	0.021715701
2_46469	1	7.608	0.021715701
2_48513	1	7.608	0.021715701
2_48591	1	7.608	0.021715701
2_49267	1	7.608	0.021715701
2_50771	1	7.608	0.021715701
2_53545	1	7.608	0.021715701
1_0311	1	8.025	0.004724633
1_0672	1	8.025	0.004724633
2_00713	1	8.025	0.004724633
2_00797	1	8.025	0.004724633
2_00798	1	8.025	0.004724633
2_01260	1	8.025	0.004724633
2_01261	1	8.025	0.004724633
2_02239	1	8.025	0.004724633
2_02240	1	8.025	0.004724633
2_04528	1	8.025	0.004724633
2_04559	1	8.025	0.004724633
2_04560	1	8.025	0.004724633
2_05267	1	8.025	0.004724633
2_06644	1	8.025	0.004724633
2_07128	1	8.025	0.004724633
2_07129	1	8.025	0.004724633
2_07630	1	8.025	0.004724633
2_07631	1	8.025	0.004724633
2_09463	1	8.025	0.004724633
2_09464	1	8.025	0.004724633
2_10316	1	8.025	0.004724633
2_10769	1	8.025	0.004724633
2_11053	1	8.025	0.004724633
2_11834	1	8.025	0.004724633
2_16743	1	8.025	0.004724633
2_16744	1	8.025	0.004724633
2_18399	1	8.025	0.004724633
2_21553	1	8.025	0.004724633
2_21554	1	8.025	0.004724633
2_21565	1	8.025	0.004724633
2_21566	1	8.025	0.004724633
2_21794	1	8.025	0.004724633
2_23423	1	8.025	0.004724633
2_23424	1	8.025	0.004724633
2_23672	1	8.025	0.004724633
2_23673	1	8.025	0.004724633
2_24737	1	8.025	0.004724633
2_26693	1	8.025	0.004724633
2_27242	1	8.025	0.004724633
2_27243	1	8.025	0.004724633
2_28620	1	8.025	0.004724633
2_28962	1	8.025	0.004724633
2_34658	1	8.025	0.004724633
2_38362	1	8.025	0.004724633
2_38363	1	8.025	0.004724633
2_40491	1	8.025	0.004724633
2_40513	1	8.025	0.004724633
2_44751	1	8.025	0.004724633
2_45656	1	8.025	0.004724633
2_48225	1	8.025	0.004724633
2_48350	1	8.025	0.004724633
2_48570	1	8.025	0.004724633
2_49907	1	8.025	0.004724633
2_51226	1	8.025	0.004724633
2_51336	1	8.025	0.004724633
2_51823	1	8.025	0.004724633
2_55582	1	8.025	0.004724633
2_40422	1	9.297	0.021708187
2_35860	1	9.713	0.004724634
2_48303	1	9.713	0.004724634
2_17813	1	12.324	0.086678153
2_00894	1	12.741	0.138717359
2_03520	1	12.741	0.138717359
2_23136	1	12.741	0.138717359
2_35269	1	12.741	0.138717359
2_41803	1	12.741	0.138717359
2_43011	1	12.741	0.138717359
2_35815	1	13.158	0.074035614
2_35938	1	13.998	0.074033177
2_37167	1	14.415	0.123211929
2_43539	1	14.415	0.123211929
2_45042	1	14.415	0.123211929
2_45385	1	14.415	0.123211929
2_52504	1	14.415	0.123211929
2_39998	1	14.831	0.203895604
2_42456	1	14.831	0.203895604
2_45131	1	16.541	0.243122899
2_43074	1	16.958	0.326525751
2_46137	1	16.958	0.326525751
2_47092	1	16.958	0.326525751
2_52871	1	16.958	0.326525751
2_42993	1	17.375	0.222953439
2_43013	1	17.375	0.222953439
2_53680	1	17.375	0.222953439
2_43675	1	17.792	0.155196038
2_18543	1	18.208	0.10025336
2_26137	1	18.208	0.10025336
2_37941	1	18.208	0.10025336
2_43251	1	18.208	0.10025336
2_43790	1	18.208	0.10025336
2_45058	1	18.208	0.10025336
2_45461	1	18.208	0.10025336
2_49794	1	18.208	0.10025336
2_49906	1	18.208	0.10025336
2_50558	1	18.208	0.10025336
2_36936	1	18.625	0.172708418
2_53036	1	18.625	0.172708418
2_41389	1	19.465	0.375261838
2_45053	1	19.465	0.375261838
2_17043	1	19.882	0.286949869
2_41323	1	19.882	0.286949869
2_01449	1	20.299	0.375261841
2_01450	1	20.299	0.375261841
2_01659	1	20.299	0.375261841
2_01660	1	20.299	0.375261841
2_10679	1	20.299	0.375261841
2_14748	1	20.299	0.375261841
2_14749	1	20.299	0.375261841
2_23490	1	20.299	0.375261841
2_23491	1	20.299	0.375261841
2_23492	1	20.299	0.375261841
2_23493	1	20.299	0.375261841
2_38566	1	20.299	0.375261841
2_39869	1	20.299	0.375261841
2_45451	1	20.299	0.375261841
2_46498	1	20.299	0.375261841
2_46683	1	20.299	0.375261841
2_48975	1	20.299	0.375261841
2_49254	1	20.299	0.375261841
2_50176	1	20.299	0.375261841
2_53178	1	20.299	0.375261841
2_53914	1	20.299	0.375261841
2_54036	1	20.299	0.375261841
2_54519	1	20.299	0.375261841
2_54840	1	20.299	0.375261841
2_02751	1	20.715	0.286949867
2_02752	1	20.715	0.286949867
2_04238	1	20.715	0.286949867
2_07049	1	20.715	0.286949867
2_10413	1	20.715	0.286949867
2_15299	1	20.715	0.286949867
2_15300	1	20.715	0.286949867
2_15301	1	20.715	0.286949867
2_15302	1	20.715	0.286949867
2_19924	1	20.715	0.286949867
2_21158	1	20.715	0.286949867
2_22812	1	20.715	0.286949867
2_22813	1	20.715	0.286949867
2_24014	1	20.715	0.286949867
2_24015	1	20.715	0.286949867
2_25420	1	20.715	0.286949867
2_26262	1	20.715	0.286949867
2_31072	1	20.715	0.286949867
2_38399	1	20.715	0.286949867
2_38758	1	20.715	0.286949867
2_40146	1	20.715	0.286949867
2_40195	1	20.715	0.286949867
2_41877	1	20.715	0.286949867
2_43260	1	20.715	0.286949867
2_43701	1	20.715	0.286949867
2_43788	1	20.715	0.286949867
2_44988	1	20.715	0.286949867
2_45630	1	20.715	0.286949867
2_45787	1	20.715	0.286949867
2_49295	1	20.715	0.286949867
2_49432	1	20.715	0.286949867
2_51172	1	20.715	0.286949867
2_51577	1	20.715	0.286949867
2_53406	1	20.715	0.286949867
2_55046	1	20.715	0.286949867
2_27296	1	21.132	0.211150292
1_1360	1	21.549	0.147443285
1_1499	1	21.549	0.147443285
2_01569	1	21.549	0.147443285
2_04243	1	21.549	0.147443285
2_04244	1	21.549	0.147443285
2_05477	1	21.549	0.147443285
2_05478	1	21.549	0.147443285
2_06780	1	21.549	0.147443285
2_06781	1	21.549	0.147443285
2_07805	1	21.549	0.147443285
2_13395	1	21.549	0.147443285
2_13396	1	21.549	0.147443285
2_14628	1	21.549	0.147443285
2_14629	1	21.549	0.147443285
2_17665	1	21.549	0.147443285
2_17666	1	21.549	0.147443285
2_18418	1	21.549	0.147443285
2_19263	1	21.549	0.147443285
2_20336	1	21.549	0.147443285
2_20479	1	21.549	0.147443285
2_21194	1	21.549	0.147443285
2_21632	1	21.549	0.147443285
2_21633	1	21.549	0.147443285
2_22638	1	21.549	0.147443285
2_22639	1	21.549	0.147443285
2_23564	1	21.549	0.147443285
2_23946	1	21.549	0.147443285
2_25743	1	21.549	0.147443285
2_26975	1	21.549	0.147443285
2_26976	1	21.549	0.147443285
2_27493	1	21.549	0.147443285
2_27494	1	21.549	0.147443285
2_27631	1	21.549	0.147443285
2_31190	1	21.549	0.147443285
2_31220	1	21.549	0.147443285
2_31876	1	21.549	0.147443285
2_37680	1	21.549	0.147443285
2_37681	1	21.549	0.147443285
2_38933	1	21.549	0.147443285
2_39167	1	21.549	0.147443285
2_39202	1	21.549	0.147443285
2_39725	1	21.549	0.147443285
2_39937	1	21.549	0.147443285
2_40157	1	21.549	0.147443285
2_40177	1	21.549	0.147443285
2_40210	1	21.549	0.147443285
2_41868	1	21.549	0.147443285
2_42595	1	21.549	0.147443285
2_43327	1	21.549	0.147443285
2_43640	1	21.549	0.147443285
2_44394	1	21.549	0.147443285
2_44608	1	21.549	0.147443285
2_45418	1	21.549	0.147443285
2_45890	1	21.549	0.147443285
2_46011	1	21.549	0.147443285
2_46328	1	21.549	0.147443285
2_46461	1	21.549	0.147443285
2_46491	1	21.549	0.147443285
2_46693	1	21.549	0.147443285
2_47388	1	21.549	0.147443285
2_47763	1	21.549	0.147443285
2_48354	1	21.549	0.147443285
2_49579	1	21.549	0.147443285
2_50246	1	21.549	0.147443285
2_50630	1	21.549	0.147443285
2_51986	1	21.549	0.147443285
2_52384	1	21.549	0.147443285
2_53762	1	21.549	0.147443285
2_53890	1	21.549	0.147443285
1_1138	1	21.965	0.095483215
2_05365	1	21.965	0.095483215
2_05366	1	21.965	0.095483215
2_07343	1	21.965	0.095483215
2_07979	1	21.965	0.095483215
2_09140	1	21.965	0.095483215
2_12261	1	21.965	0.095483215
2_12262	1	21.965	0.095483215
2_12570	1	21.965	0.095483215
2_12811	1	21.965	0.095483215
2_12812	1	21.965	0.095483215
2_13484	1	21.965	0.095483215
2_13485	1	21.965	0.095483215
2_17121	1	21.965	0.095483215
2_17122	1	21.965	0.095483215
2_17306	1	21.965	0.095483215
2_17331	1	21.965	0.095483215
2_17332	1	21.965	0.095483215
2_18396	1	21.965	0.095483215
2_20389	1	21.965	0.095483215
2_20390	1	21.965	0.095483215
2_20911	1	21.965	0.095483215
2_22731	1	21.965	0.095483215
2_27695	1	21.965	0.095483215
2_29079	1	21.965	0.095483215
2_29080	1	21.965	0.095483215
2_30751	1	21.965	0.095483215
2_31257	1	21.965	0.095483215
2_31348	1	21.965	0.095483215
2_40579	1	21.965	0.095483215
2_40647	1	21.965	0.095483215
2_40974	1	21.965	0.095483215
2_43180	1	21.965	0.095483215
2_44985	1	21.965	0.095483215
2_46985	1	21.965	0.095483215
2_47290	1	21.965	0.095483215
2_48587	1	21.965	0.095483215
2_51849	1	21.965	0.095483215
2_52911	1	21.965	0.095483215
2_53574	1	21.965	0.095483215
2_53737	1	21.965	0.095483215
2_54641	1	21.965	0.095483215
2_03541	1	23.237	0.007470572
2_05811	1	23.237	0.007470572
2_07755	1	23.237	0.007470572
2_24484	1	23.237	0.007470572
2_25990	1	23.237	0.007470572
2_27613	1	23.237	0.007470572
2_34764	1	23.237	0.007470572
2_35215	1	23.237	0.007470572
2_35216	1	23.237	0.007470572
2_36226	1	23.237	0.007470572
2_39942	1	23.237	0.007470572
2_41984	1	23.237	0.007470572
2_47796	1	23.237	0.007470572
2_49327	1	23.237	0.007470572
2_51542	1	23.237	0.007470572
2_01755	1	24.508	0.000128756
2_02441	1	24.508	0.000128756
2_02442	1	24.508	0.000128756
2_02815	1	24.508	0.000128756
2_04006	1	24.508	0.000128756
2_04007	1	24.508	0.000128756
2_04008	1	24.508	0.000128756
2_05459	1	24.508	0.000128756
2_05460	1	24.508	0.000128756
2_11380	1	24.508	0.000128756
2_11381	1	24.508	0.000128756
2_19841	1	24.508	0.000128756
2_20218	1	24.508	0.000128756
2_20951	1	24.508	0.000128756
2_20952	1	24.508	0.000128756
2_21985	1	24.508	0.000128756
2_21986	1	24.508	0.000128756
2_25210	1	24.508	0.000128756
2_26164	1	24.508	0.000128756
2_26165	1	24.508	0.000128756
2_26166	1	24.508	0.000128756
2_31047	1	24.508	0.000128756
2_31219	1	24.508	0.000128756
2_31645	1	24.508	0.000128756
2_32264	1	24.508	0.000128756
2_40135	1	24.508	0.000128756
2_40441	1	24.508	0.000128756
2_44175	1	24.508	0.000128756
2_44686	1	24.508	0.000128756
2_47490	1	24.508	0.000128756
2_50182	1	24.508	0.000128756
2_51737	1	24.508	0.000128756
2_51814	1	24.508	0.000128756
2_52678	1	24.508	0.000128756
2_52877	1	24.508	0.000128756
2_54184	1	24.508	0.000128756
2_54598	1	24.508	0.000128756
2_55509	1	24.508	0.000128756
2_26171	1	24.925	0.011963574
2_32677	1	24.925	0.011963574
2_34723	1	24.925	0.011963574
2_36829	1	25.342	0.033499791
2_55598	1	25.342	0.033499791
2_28284	1	27.498	0.003701784
2_51494	1	27.498	0.003701784
2_48181	1	32.015	0.043294
1_0756	1	34.626	0.304522688
2_00267	1	34.626	0.304522688
2_00269	1	34.626	0.304522688
2_00270	1	34.626	0.304522688
2_00272	1	34.626	0.304522688
2_02118	1	34.626	0.304522688
2_02119	1	34.626	0.304522688
2_05673	1	34.626	0.304522688
2_05674	1	34.626	0.304522688
2_07778	1	34.626	0.304522688
2_09007	1	34.626	0.304522688
2_09064	1	34.626	0.304522688
2_09065	1	34.626	0.304522688
2_10578	1	34.626	0.304522688
2_10840	1	34.626	0.304522688
2_15807	1	34.626	0.304522688
2_17788	1	34.626	0.304522688
2_19859	1	34.626	0.304522688
2_25286	1	34.626	0.304522688
2_26264	1	34.626	0.304522688
2_28068	1	34.626	0.304522688
2_30944	1	34.626	0.304522688
2_30945	1	34.626	0.304522688
2_40246	1	34.626	0.304522688
2_46636	1	34.626	0.304522688
2_49686	1	34.626	0.304522688
2_55091	1	34.626	0.304522688
2_03231	1	35.043	0.228218426
2_03232	1	35.043	0.228218426
2_04071	1	35.043	0.228218426
2_07587	1	35.043	0.228218426
2_08976	1	35.043	0.228218426
2_10113	1	35.043	0.228218426
2_13900	1	35.043	0.228218426
2_16404	1	35.043	0.228218426
2_16405	1	35.043	0.228218426
2_27544	1	35.043	0.228218426
2_29421	1	35.043	0.228218426
2_29422	1	35.043	0.228218426
2_46248	1	35.043	0.228218426
2_05372	1	35.459	0.304522688
2_05373	1	35.459	0.304522688
2_06449	1	35.459	0.304522688
2_08553	1	35.459	0.304522688
2_10507	1	35.459	0.304522688
2_11467	1	35.459	0.304522688
2_17325	1	35.459	0.304522688
2_17654	1	35.459	0.304522688
2_17655	1	35.459	0.304522688
2_17744	1	35.459	0.304522688
2_18140	1	35.459	0.304522688
2_20342	1	35.459	0.304522688
2_30077	1	35.459	0.304522688
2_31192	1	35.459	0.304522688
2_32122	1	35.459	0.304522688
2_50139	1	35.459	0.304522688
2_50687	1	35.459	0.304522688
1_1445	1	35.876	0.423086348
2_00219	1	35.876	0.423086348
2_02050	1	35.876	0.423086348
2_04035	1	35.876	0.423086348
2_04084	1	35.876	0.423086348
2_06519	1	35.876	0.423086348
2_11653	1	35.876	0.423086348
2_12092	1	35.876	0.423086348
2_12093	1	35.876	0.423086348
2_12546	1	35.876	0.423086348
2_12547	1	35.876	0.423086348
2_14137	1	35.876	0.423086348
2_14138	1	35.876	0.423086348
2_14289	1	35.876	0.423086348
2_18904	1	35.876	0.423086348
2_19154	1	35.876	0.423086348
2_19155	1	35.876	0.423086348
2_24534	1	35.876	0.423086348
2_27709	1	35.876	0.423086348
2_27799	1	35.876	0.423086348
2_29661	1	35.876	0.423086348
2_30814	1	35.876	0.423086348
2_33346	1	35.876	0.423086348
2_35155	1	35.876	0.423086348
2_36782	1	35.876	0.423086348
2_38654	1	35.876	0.423086348
2_39955	1	35.876	0.423086348
2_51288	1	35.876	0.423086348
2_24758	1	37.147	0.525604593
2_07436	1	37.564	0.423086348
2_11964	1	37.564	0.423086348
2_19840	1	37.564	0.423086348
2_22781	1	37.564	0.423086348
2_24017	1	37.564	0.423086348
2_24100	1	37.564	0.423086348
2_27027	1	37.564	0.423086348
2_34346	1	37.564	0.423086348
2_54268	1	37.564	0.423086348
2_11641	1	37.981	0.332075744
2_44763	1	37.981	0.332075744
2_48801	1	37.981	0.332075744
2_52156	1	37.981	0.332075744
2_00415	1	38.821	0.163110001
2_00416	1	38.821	0.163110001
2_05934	1	38.821	0.163110001
2_12931	1	38.821	0.163110001
2_14774	1	38.821	0.163110001
2_14775	1	38.821	0.163110001
2_22207	1	38.821	0.163110001
2_24007	1	38.821	0.163110001
2_24008	1	38.821	0.163110001
2_27058	1	38.821	0.163110001
2_31435	1	38.821	0.163110001
2_31436	1	38.821	0.163110001
2_43235	1	38.821	0.163110001
2_52401	1	38.821	0.163110001
2_12731	1	39.238	0.228218426
2_12732	1	39.238	0.228218426
2_13808	1	39.238	0.228218426
2_13809	1	39.238	0.228218426
2_15313	1	39.238	0.228218426
2_15314	1	39.238	0.228218426
2_34582	1	39.238	0.228218426
2_03825	1	42.784	0.009919638
2_03922	1	42.784	0.009919636
2_07819	1	42.784	0.009919634
2_15659	1	42.784	0.009919632
2_16440	1	42.784	0.00991963
2_16441	1	42.784	0.009919628
2_20413	1	42.784	0.009919626
2_26831	1	42.784	0.009919624
2_30284	1	42.784	0.009919622
2_33835	1	42.784	0.00991962
2_35070	1	42.784	0.009919618
2_42648	1	42.784	0.009919616
2_43257	1	42.784	0.009919614
2_13788	1	43.2	0.000461088
2_15684	1	43.2	0.000461088
2_15685	1	43.2	0.000461088
2_20296	1	43.2	0.000461087
2_20297	1	43.2	0.000461087
2_29544	1	43.2	0.000461086
2_32406	1	43.2	0.000461086
2_33112	1	43.2	0.000461085
2_34422	1	43.2	0.000461085
2_34423	1	43.2	0.000461085
2_37006	1	43.2	0.000461084
2_54121	1	43.2	0.000461084
1_0535	1	43.617	0.008291755
2_00774	1	43.617	0.008291753
2_01011	1	43.617	0.008291752
2_01012	1	43.617	0.00829175
2_02585	1	43.617	0.008291748
2_05045	1	43.617	0.008291746
2_05461	1	43.617	0.008291744
2_07950	1	43.617	0.008291742
2_14420	1	43.617	0.00829174
2_14680	1	43.617	0.008291738
2_22218	1	43.617	0.008291737
2_22219	1	43.617	0.008291735
2_24757	1	43.617	0.008291733
2_27687	1	43.617	0.008291731
2_28373	1	43.617	0.008291729
2_29534	1	43.617	0.008291727
2_29822	1	43.617	0.008291725
2_29823	1	43.617	0.008291723
2_30127	1	43.617	0.008291722
2_30759	1	43.617	0.00829172
2_31099	1	43.617	0.008291718
2_32146	1	43.617	0.008291716
2_32411	1	43.617	0.008291714
2_34396	1	43.617	0.008291712
2_39748	1	43.617	0.00829171
2_42186	1	43.617	0.008291708
2_49815	1	43.617	0.008291706
2_52320	1	43.617	0.008291705
2_53544	1	43.617	0.008291703
2_04778	1	44.034	0.000167084
2_07524	1	44.034	0.000167084
2_07525	1	44.034	0.000167083
2_12173	1	44.034	0.000167083
2_12340	1	44.034	0.000167083
2_13604	1	44.034	0.000167083
2_18446	1	44.034	0.000167082
2_26498	1	44.034	0.000167082
2_27505	1	44.034	0.000167082
2_29059	1	44.034	0.000167081
2_29107	1	44.034	0.000167081
2_30019	1	44.034	0.000167081
2_30020	1	44.034	0.000167081
2_44774	1	44.034	0.00016708
2_11374	1	44.45	0.011395079
2_11933	1	44.45	0.011395077
2_19379	1	44.45	0.011395075
2_31575	1	44.45	0.011395073
1_1092	1	44.867	0.031049804
2_05867	1	44.867	0.0310498
2_05868	1	44.867	0.031049796
2_12285	1	44.867	0.031049792
2_12719	1	44.867	0.031049789
2_15058	1	44.867	0.031049785
2_15059	1	44.867	0.031049781
2_15178	1	44.867	0.031049778
2_15179	1	44.867	0.031049774
2_16952	1	44.867	0.03104977
2_19390	1	44.867	0.031049766
2_30384	1	44.867	0.031049763
2_34169	1	44.867	0.031049759
2_34256	1	44.867	0.031049755
2_35991	1	44.867	0.031049752
2_38969	1	44.867	0.031049748
2_39720	1	44.867	0.031049744
2_50595	1	44.867	0.031049741
2_54730	1	44.867	0.031049737
2_54868	1	44.867	0.031049733
2_01525	1	45.284	0.005453966
2_00498	1	45.7	1.74E-05
2_12248	1	45.7	1.74E-05
2_12249	1	45.7	1.74E-05
2_28723	1	45.7	1.74E-05
2_28724	1	45.7	1.74E-05
2_31221	1	45.7	1.74E-05
2_31222	1	45.7	1.74E-05
2_42366	1	45.7	1.74E-05
2_47656	1	45.7	1.74E-05
1_0646	1	46.117	0.007990299
1_0874	1	46.117	0.007990297
2_01988	1	46.117	0.007990295
2_01989	1	46.117	0.007990293
2_03371	1	46.117	0.007990291
2_03372	1	46.117	0.007990289
2_18415	1	46.117	0.007990287
2_18813	1	46.117	0.007990285
2_18914	1	46.117	0.007990284
2_25895	1	46.117	0.007990282
2_25896	1	46.117	0.00799028
2_31883	1	46.117	0.007990278
2_31884	1	46.117	0.007990276
2_39459	1	46.117	0.007990274
2_43625	1	46.117	0.007990272
2_47976	1	46.117	0.00799027
2_51680	1	46.117	0.007990269
1_0826	1	46.534	0.000128757
2_00560	1	46.534	0.000128756
2_00561	1	46.534	0.000128756
2_08731	1	46.534	0.000128756
2_24673	1	46.534	0.000128756
2_29967	1	46.534	0.000128756
2_03124	1	46.95	0.007470572
2_03125	1	46.95	0.007470572
2_24009	1	46.95	0.007470572
2_24010	1	46.95	0.007470572
2_09406	1	47.791	0.066577166
2_13379	1	47.791	0.066577166
2_19554	1	47.791	0.066577166
2_24238	1	47.791	0.066577166
2_24239	1	47.791	0.066577166
2_51233	1	47.791	0.066577166
2_54021	1	47.791	0.066577166
2_18721	1	48.631	0.165531253
2_32202	1	48.631	0.165531253
2_32663	1	48.631	0.165531253
1_0403	1	49.048	0.095483215
2_03648	1	49.048	0.095483215
2_05833	1	49.048	0.095483215
2_19422	1	49.048	0.095483215
2_26030	1	49.048	0.095483215
2_26727	1	49.048	0.095483215
2_26728	1	49.048	0.095483215
2_28148	1	49.048	0.095483215
2_28872	1	49.048	0.095483215
2_32801	1	49.048	0.095483215
2_34558	1	49.048	0.095483215
2_44514	1	49.048	0.095483215
1_0106	1	49.465	0.147443285
2_01170	1	49.465	0.147443285
2_03473	1	49.465	0.147443285
2_03474	1	49.465	0.147443285
2_07181	1	49.465	0.147443285
2_07182	1	49.465	0.147443285
2_15821	1	49.465	0.147443285
2_17060	1	49.465	0.147443285
2_20116	1	49.465	0.147443285
2_24268	1	49.465	0.147443285
2_24269	1	49.465	0.147443285
2_24917	1	49.465	0.147443285
2_26428	1	49.465	0.147443285
2_27091	1	49.465	0.147443285
2_27373	1	49.465	0.147443285
2_27374	1	49.465	0.147443285
2_28717	1	49.465	0.147443285
2_30165	1	49.465	0.147443285
2_31132	1	49.465	0.147443285
2_32647	1	49.465	0.147443285
2_49637	1	49.465	0.147443285
2_53814	1	49.465	0.147443285
2_53926	1	49.465	0.147443285
2_11046	1	49.881	0.232257721
2_28716	1	49.881	0.232257721
2_28718	1	49.881	0.232257721
2_34198	1	49.881	0.232257721
2_04783	1	50.298	0.310884049
2_11845	1	50.298	0.310884049
2_28066	1	50.298	0.310884049
2_28067	1	50.298	0.310884049
2_28715	1	50.298	0.310884049
2_34043	1	50.298	0.310884049
2_40176	1	50.298	0.310884049
2_42956	1	50.298	0.310884049
2_51092	1	50.298	0.310884049
2_53421	1	50.298	0.310884049
2_08159	1	50.715	0.427959063
2_22690	1	50.715	0.427959059
2_22691	1	50.715	0.427959054
2_32753	1	50.715	0.427959049
2_34387	1	50.715	0.427959045
2_11406	1	51.131	0.332806547
2_15708	1	51.131	0.332806543
2_16481	1	51.131	0.332806539
2_18479	1	51.131	0.332806534
2_22810	1	51.131	0.33280653
2_28021	1	51.131	0.332806526
2_28508	1	51.131	0.332806522
2_28826	1	51.131	0.332806518
2_28827	1	51.131	0.332806513
2_30138	1	51.131	0.332806509
2_31590	1	51.131	0.332806505
2_31591	1	51.131	0.332806501
2_52301	1	51.131	0.332806497
2_54774	1	51.131	0.332806492
2_07662	1	51.548	0.424063245
2_13373	1	51.548	0.424063241
2_27029	1	51.548	0.424063236
2_36968	1	51.548	0.424063231
2_24948	1	51.965	0.329338329
2_05058	1	52.381	0.247117821
2_11763	1	52.381	0.247117818
2_15134	1	52.381	0.247117814
2_32005	1	52.381	0.24711781
2_34754	1	52.381	0.247117807
2_40006	1	52.381	0.247117803
2_53128	1	52.381	0.2471178
2_13275	1	52.798	0.35258439
2_13276	1	52.798	0.352584386
2_19941	1	52.798	0.352584382
2_19942	1	52.798	0.352584377
2_27295	1	52.798	0.352584373
2_27719	1	52.798	0.352584369
2_37087	1	52.798	0.352584365
2_37264	1	52.798	0.35258436
2_38756	1	52.798	0.352584356
2_42416	1	52.798	0.352584352
2_51039	1	52.798	0.352584348
2_53431	1	52.798	0.352584343
2_00296	1	53.215	0.477208469
2_00297	1	53.215	0.477208464
2_10755	1	53.215	0.477208459
2_15105	1	53.215	0.477208454
2_16353	1	53.215	0.47720845
2_16912	1	53.215	0.477208445
2_16913	1	53.215	0.47720844
2_18973	1	53.215	0.477208435
2_19714	1	53.215	0.47720843
2_19896	1	53.215	0.477208425
2_21007	1	53.215	0.47720842
2_21008	1	53.215	0.477208415
2_24915	1	53.215	0.47720841
2_33204	1	53.215	0.477208405
2_33402	1	53.215	0.477208401
2_42617	1	53.215	0.477208396
2_48424	1	53.215	0.477208391
2_53254	1	53.215	0.477208386
2_04147	1	53.631	0.349063285
2_04148	1	53.631	0.349063281
2_06604	1	53.631	0.349063277
2_09408	1	53.631	0.349063273
2_11841	1	53.631	0.349063268
2_13511	1	53.631	0.349063264
2_15633	1	53.631	0.34906326
2_16573	1	53.631	0.349063256
2_16574	1	53.631	0.349063252
2_20408	1	53.631	0.349063247
2_20869	1	53.631	0.349063243
2_21189	1	53.631	0.349063239
2_21190	1	53.631	0.349063235
2_21936	1	53.631	0.34906323
2_22483	1	53.631	0.349063226
2_22484	1	53.631	0.349063222
2_27170	1	53.631	0.349063218
2_29450	1	53.631	0.349063214
2_30913	1	53.631	0.349063209
2_47756	1	53.631	0.349063205
2_50979	1	53.631	0.349063201
2_13529	1	54.048	0.241172395
2_20182	1	54.048	0.241172392
2_22809	1	54.048	0.241172388
2_29001	1	54.048	0.241172384
2_34229	1	54.048	0.241172381
2_46935	1	54.048	0.241172377
2_49965	1	54.048	0.241172374
2_54161	1	54.048	0.24117237
2_54804	1	54.048	0.241172367
2_38843	1	54.465	0.15327036
2_49062	1	54.465	0.153270357
2_54374	1	54.465	0.153270354
2_30489	1	55.305	0.169525925
2_33558	1	55.305	0.169525922
2_01542	1	55.722	0.235350712
2_07038	1	55.722	0.235350708
2_07039	1	55.722	0.235350705
2_08720	1	55.722	0.235350701
2_08721	1	55.722	0.235350698
2_09237	1	55.722	0.235350694
2_13538	1	55.722	0.235350691
2_13539	1	55.722	0.235350687
2_15709	1	55.722	0.235350684
2_15710	1	55.722	0.235350681
2_17511	1	55.722	0.235350677
2_20923	1	55.722	0.235350674
2_20924	1	55.722	0.23535067
2_27322	1	55.722	0.235350667
2_27323	1	55.722	0.235350663
2_28086	1	55.722	0.23535066
2_33158	1	55.722	0.235350656
2_34713	1	55.722	0.235350653
2_51530	1	55.722	0.235350649
2_51773	1	55.722	0.235350646
2_55428	1	55.722	0.235350642
1_1316	1	58.333	0.205384426
2_06311	1	58.333	0.205384422
2_12964	1	58.333	0.205384419
2_12965	1	58.333	0.205384416
2_12966	1	58.333	0.205384413
2_16085	1	58.333	0.20538441
2_16086	1	58.333	0.205384406
2_16748	1	58.333	0.205384403
2_20261	1	58.333	0.2053844
2_20262	1	58.333	0.205384397
2_22188	1	58.333	0.205384393
2_22189	1	58.333	0.20538439
2_27078	1	58.333	0.205384387
2_29284	1	58.333	0.205384384
2_29902	1	58.333	0.205384381
2_30349	1	58.333	0.205384377
2_32361	1	58.333	0.205384374
2_38852	1	58.333	0.205384371
2_53203	1	58.333	0.205384368
2_54988	1	58.333	0.205384365
2_49620	1	58.75	0.141671262
2_54336	1	58.75	0.141671259
2_17041	1	59.166	0.090033202
2_20247	1	59.166	0.0900332
2_03379	1	59.583	0.157391575
2_06617	1	59.583	0.157391572
2_06618	1	59.583	0.157391569
2_08603	1	59.583	0.157391567
2_09493	1	59.583	0.157391564
2_13335	1	59.583	0.157391561
2_13942	1	59.583	0.157391558
2_16467	1	59.583	0.157391555
2_18049	1	59.583	0.157391552
2_19194	1	59.583	0.15739155
2_19195	1	59.583	0.157391547
2_26865	1	59.583	0.157391544
2_26866	1	59.583	0.157391541
2_29388	1	59.583	0.157391538
2_33806	1	59.583	0.157391536
2_49099	1	59.583	0.157391533
2_49296	1	59.583	0.15739153
2_50685	1	59.583	0.157391527
2_51882	1	59.583	0.157391524
2_53642	1	59.583	0.157391521
1_0910	1	60.423	0.155055578
2_07231	1	60.423	0.155055575
2_32314	1	61.264	0.292946761
1_0992	1	61.68	0.407362465
2_06502	1	61.68	0.407362461
2_08538	1	61.68	0.407362456
2_19060	1	61.68	0.407362451
2_19061	1	61.68	0.407362447
2_24429	1	61.68	0.407362442
2_32768	1	61.68	0.407362438
2_40216	1	61.68	0.407362433
2_42795	1	61.68	0.407362429
2_14293	1	62.097	0.314956978
2_28558	1	62.097	0.314956974
2_32098	1	62.097	0.31495697
2_33022	1	62.097	0.314956966
2_36867	1	62.097	0.314956962
2_36889	1	62.097	0.314956958
2_12809	1	62.514	0.212849742
2_12810	1	62.514	0.212849739
2_27547	1	62.514	0.212849736
2_31788	1	62.514	0.212849732
2_32409	1	62.514	0.212849729
2_33216	1	62.514	0.212849726
2_55295	1	62.514	0.212849723
2_14222	1	63.354	0.095384037
2_15162	1	63.354	0.095384035
2_15193	1	63.354	0.095384033
2_15194	1	63.354	0.095384031
2_16411	1	63.354	0.095384029
2_17560	1	63.354	0.095384026
2_17561	1	63.354	0.095384024
2_19980	1	63.354	0.095384022
2_19981	1	63.354	0.09538402
2_20109	1	63.354	0.095384018
2_20110	1	63.354	0.095384015
2_21298	1	63.354	0.095384013
2_30518	1	63.354	0.095384011
2_31332	1	63.354	0.095384009
2_31333	1	63.354	0.095384006
2_39075	1	63.354	0.095384004
2_40423	1	63.354	0.095384002
2_41850	1	63.354	0.095384
2_46376	1	63.354	0.095383998
2_55210	1	63.354	0.095383995
1_0349	1	64.195	0.024822137
1_0417	1	64.195	0.024822136
2_01225	1	64.195	0.024822135
2_01227	1	64.195	0.024822134
2_01381	1	64.195	0.024822133
2_01382	1	64.195	0.024822132
2_06755	1	64.195	0.024822131
2_06756	1	64.195	0.02482213
2_06757	1	64.195	0.024822128
2_08409	1	64.195	0.024822127
2_09061	1	64.195	0.024822126
2_09062	1	64.195	0.024822125
2_09082	1	64.195	0.024822124
2_09250	1	64.195	0.024822123
2_12603	1	64.195	0.024822122
2_12604	1	64.195	0.024822121
2_14119	1	64.195	0.024822119
2_20163	1	64.195	0.024822118
2_20858	1	64.195	0.024822117
2_22945	1	64.195	0.024822116
2_22946	1	64.195	0.024822115
2_23987	1	64.195	0.024822114
2_23988	1	64.195	0.024822113
2_24336	1	64.195	0.024822112
2_24337	1	64.195	0.02482211
2_24961	1	64.195	0.024822109
2_27222	1	64.195	0.024822108
2_29034	1	64.195	0.024822107
2_30246	1	64.195	0.024822106
2_31236	1	64.195	0.024822105
2_32281	1	64.195	0.024822104
2_34238	1	64.195	0.024822102
2_01966	1	64.611	0.006750101
2_01967	1	64.611	0.0067501
2_25310	1	64.611	0.0067501
2_30880	1	64.611	0.006750099
2_30881	1	64.611	0.006750099
2_36429	1	64.611	0.006750098
2_14122	1	65.028	0.000300415
2_14123	1	65.028	0.000300415
2_21246	1	65.028	0.000300416
2_21247	1	65.028	0.000300416
2_21324	1	65.028	0.000300416
2_31442	1	65.028	0.000300416
2_34357	1	65.028	0.000300416
2_36296	1	65.445	0.003033295
2_27268	1	65.861	0.026490862
2_07700	1	66.278	0.073326985
2_16339	1	66.278	0.073326998
2_19885	1	66.278	0.07332701
2_22066	1	66.278	0.073327023
2_24044	1	66.278	0.073327036
2_38535	1	66.278	0.073327048
2_39578	1	66.278	0.073327061
2_52654	1	66.278	0.073327074
1_0543	1	66.695	0.042540921
2_00313	1	66.695	0.042540931
2_00314	1	66.695	0.04254094
2_00315	1	66.695	0.04254095
2_00316	1	66.695	0.042540959
2_05233	1	66.695	0.042540969
2_05234	1	66.695	0.042540978
2_08163	1	66.695	0.042540988
2_18706	1	66.695	0.042540997
2_22214	1	66.695	0.042541007
2_22215	1	66.695	0.042541016
2_22950	1	66.695	0.042541026
2_22951	1	66.695	0.042541035
2_24569	1	66.695	0.042541045
2_26394	1	66.695	0.042541054
2_32754	1	66.695	0.042541064
2_38534	1	66.695	0.042541073
2_04376	1	67.111	0.01374648
2_07828	1	67.111	0.013746485
2_14185	1	67.111	0.01374649
2_14627	1	67.111	0.013746496
2_15565	1	67.111	0.013746501
2_15566	1	67.111	0.013746506
2_25885	1	67.111	0.013746512
2_28248	1	67.111	0.013746517
2_33811	1	67.111	0.013746522
2_07286	1	67.528	0.050710701
2_13103	1	67.528	0.050710711
2_13104	1	67.528	0.050710721
2_15963	1	67.528	0.050710732
2_54973	1	67.528	0.050710742
2_15156	1	67.945	0.095296836
2_21547	1	68.361	0.048137495
2_33524	1	68.361	0.048137505
2_03016	1	68.778	0.016991434
2_16051	1	68.778	0.016991439
2_25869	1	68.778	0.016991445
2_25870	1	68.778	0.016991451
2_25871	1	68.778	0.016991457
2_25872	1	68.778	0.016991462
2_32549	1	68.778	0.016991468
2_46152	1	68.778	0.016991474
1_0699	1	69.195	0.045582582
2_05111	1	69.195	0.045582591
2_07472	1	69.195	0.0455826
2_07473	1	69.195	0.045582609
2_10119	1	69.195	0.045582619
2_10120	1	69.195	0.045582628
2_14572	1	69.195	0.045582637
2_18887	1	69.195	0.045582635
2_20027	1	69.195	0.045582634
2_20210	1	69.195	0.045582632
2_21054	1	69.195	0.045582631
2_25250	1	69.195	0.045582629
2_25251	1	69.195	0.045582628
2_25597	1	69.195	0.045582626
2_26643	1	69.195	0.045582624
2_29577	1	69.195	0.045582623
2_31037	1	69.195	0.045582621
2_31038	1	69.195	0.04558262
2_32510	1	69.195	0.045582618
2_33734	1	69.195	0.045582616
2_51283	1	69.195	0.045582615
2_54371	1	69.195	0.045582613
2_38145	1	69.611	0.081883441
2_38146	1	69.611	0.081883438
2_45089	1	69.611	0.081883436
2_28105	1	70.883	0.126659282
2_52918	1	71.299	0.204622833
2_07176	1	71.716	0.141548083
2_07177	1	71.716	0.14154808
2_07178	1	71.716	0.141548077
2_27371	1	71.716	0.141548074
2_04707	1	72.133	0.076510662
2_04708	1	72.133	0.07651066
2_14377	1	72.133	0.076510657
2_31963	1	72.133	0.076510655
2_20034	1	72.55	0.03134869
2_39604	1	72.55	0.031348689
2_48050	1	72.55	0.031348687
2_52067	1	72.55	0.031348686
2_55167	1	72.55	0.031348685
2_03382	1	72.966	0.005997462
2_38766	1	72.966	0.005997462
2_07280	1	73.383	3.40E-06
2_06915	1	73.8	0.005410755
2_09110	1	73.8	0.005410755
2_16246	1	73.8	0.005410756
2_47933	1	73.8	0.005410756
2_33453	1	74.216	1.87E-06
2_34174	1	74.216	1.87E-06
2_28582	1	74.633	0.00900605
2_20735	1	75.05	0.027950137
2_31515	1	76.76	0.000129338
2_31514	1	77.176	0.007224743
2_37445	1	77.593	0.000162329
2_48787	1	77.593	0.000162329
1_0006	2	0	0.425360675
1_0261	2	0	0.425360677
1_0763	2	0	0.425360679
1_1014	2	0	0.425360682
1_1418	2	0	0.425360684
1_1446	2	0	0.425360686
1_1521	2	0	0.425360688
2_00057	2	0	0.42536069
2_00244	2	0	0.425360692
2_00325	2	0	0.425360694
2_00888	2	0	0.425360696
2_00889	2	0	0.425360699
2_00910	2	0	0.425360701
2_00911	2	0	0.425360703
2_00912	2	0	0.425360705
2_00913	2	0	0.425360707
2_00915	2	0	0.425360709
2_00961	2	0	0.425360711
2_01183	2	0	0.425360713
2_01184	2	0	0.425360715
2_01231	2	0	0.425360718
2_01648	2	0	0.42536072
2_02431	2	0	0.425360722
2_02432	2	0	0.425360724
2_02506	2	0	0.425360726
2_02507	2	0	0.425360728
2_02539	2	0	0.42536073
2_02825	2	0	0.425360732
2_02826	2	0	0.425360734
2_02894	2	0	0.425360737
2_02895	2	0	0.425360739
2_02970	2	0	0.425360741
2_03345	2	0	0.425360743
2_03400	2	0	0.425360745
2_03734	2	0	0.425360747
2_03735	2	0	0.425360749
2_04142	2	0	0.425360751
2_04143	2	0	0.425360754
2_04189	2	0	0.425360756
2_04190	2	0	0.425360758
2_04213	2	0	0.42536076
2_04392	2	0	0.425360762
2_04489	2	0	0.425360764
2_04493	2	0	0.425360766
2_04561	2	0	0.425360768
2_04562	2	0	0.42536077
2_04563	2	0	0.425360773
2_04942	2	0	0.425360775
2_04943	2	0	0.425360777
2_05340	2	0	0.425360779
2_05675	2	0	0.425360781
2_05676	2	0	0.425360783
2_06083	2	0	0.425360785
2_06084	2	0	0.425360787
2_06320	2	0	0.425360789
2_06321	2	0	0.425360792
2_06545	2	0	0.425360794
2_07006	2	0	0.425360796
2_07007	2	0	0.425360798
2_07217	2	0	0.4253608
2_07218	2	0	0.425360802
2_07415	2	0	0.425360804
2_07416	2	0	0.425360806
2_07644	2	0	0.425360809
2_07740	2	0	0.425360811
2_07993	2	0	0.425360813
2_07994	2	0	0.425360815
2_08866	2	0	0.425360817
2_08900	2	0	0.425360819
2_08901	2	0	0.425360821
2_08913	2	0	0.425360823
2_08914	2	0	0.425360825
2_10529	2	0	0.425360828
2_11390	2	0	0.42536083
2_11391	2	0	0.425360832
2_11667	2	0	0.425360834
2_11718	2	0	0.425360836
2_11719	2	0	0.425360838
2_11923	2	0	0.42536084
2_12512	2	0	0.425360842
2_12513	2	0	0.425360844
2_12943	2	0	0.425360847
2_13397	2	0	0.425360849
2_13449	2	0	0.425360851
2_13569	2	0	0.425360853
2_13570	2	0	0.425360855
2_13598	2	0	0.425360857
2_13599	2	0	0.425360859
2_13877	2	0	0.425360861
2_13878	2	0	0.425360864
2_14033	2	0	0.425360866
2_14052	2	0	0.425360868
2_14053	2	0	0.42536087
2_14510	2	0	0.425360872
2_14511	2	0	0.425360874
2_14897	2	0	0.425360876
2_14898	2	0	0.425360878
2_16244	2	0	0.42536088
2_16245	2	0	0.425360883
2_16289	2	0	0.425360885
2_16290	2	0	0.425360887
2_16804	2	0	0.425360889
2_16805	2	0	0.425360891
2_16806	2	0	0.425360893
2_16807	2	0	0.425360895
2_17609	2	0	0.425360897
2_18497	2	0	0.425360899
2_18660	2	0	0.425360902
2_18764	2	0	0.425360904
2_18779	2	0	0.425360906
2_18989	2	0	0.425360908
2_19528	2	0	0.42536091
2_20040	2	0	0.425360912
2_20107	2	0	0.425360914
2_21019	2	0	0.425360916
2_21048	2	0	0.425360919
2_21049	2	0	0.425360921
2_21085	2	0	0.425360923
2_21133	2	0	0.425360925
2_21192	2	0	0.425360927
2_21310	2	0	0.425360929
2_22137	2	0	0.425360931
2_22138	2	0	0.425360933
2_23348	2	0	0.425360935
2_23349	2	0	0.425360938
2_23933	2	0	0.42536094
2_24058	2	0	0.425360942
2_24545	2	0	0.425360944
2_24833	2	0	0.425360946
2_24834	2	0	0.425360948
2_25519	2	0	0.42536095
2_25520	2	0	0.425360952
2_25568	2	0	0.425360954
2_25569	2	0	0.425360957
2_25570	2	0	0.425360959
2_25716	2	0	0.425360961
2_25795	2	0	0.425360963
2_25796	2	0	0.425360965
2_25886	2	0	0.425360967
2_25931	2	0	0.425360969
2_25932	2	0	0.425360971
2_26234	2	0	0.425360974
2_26235	2	0	0.425360976
2_26620	2	0	0.425360978
2_27088	2	0	0.42536098
2_27382	2	0	0.425360982
2_27546	2	0	0.425360984
2_28011	2	0	0.425360986
2_28044	2	0	0.425360988
2_28794	2	0	0.42536099
2_28806	2	0	0.425360993
2_29164	2	0	0.425360995
2_29226	2	0	0.425360997
2_29412	2	0	0.425360999
2_29427	2	0	0.425361001
2_29433	2	0	0.425361003
2_29615	2	0	0.425361005
2_29891	2	0	0.425361007
2_30511	2	0	0.425361009
2_30512	2	0	0.425361012
2_30981	2	0	0.425361014
2_31039	2	0	0.425361016
2_31237	2	0	0.425361018
2_31362	2	0	0.42536102
2_32239	2	0	0.425361022
2_32880	2	0	0.425361024
2_33240	2	0	0.425361026
2_33289	2	0	0.425361029
2_33794	2	0	0.425361031
2_33842	2	0	0.425361033
2_33844	2	0	0.425361035
2_33969	2	0	0.425361037
2_34089	2	0	0.425361039
2_34215	2	0	0.425361041
2_35175	2	0	0.425361043
2_37778	2	0	0.425361045
2_37779	2	0	0.425361048
2_37888	2	0	0.42536105
2_37889	2	0	0.425361052
2_38102	2	0	0.425361054
2_38127	2	0	0.425361056
2_38128	2	0	0.425361058
2_38286	2	0	0.42536106
2_38297	2	0	0.425361062
2_38346	2	0	0.425361065
2_38347	2	0	0.425361067
2_38352	2	0	0.425361069
2_38525	2	0	0.425361071
2_38571	2	0	0.425361073
2_38592	2	0	0.425361075
2_38593	2	0	0.425361077
2_38858	2	0	0.425361079
2_38859	2	0	0.425361081
2_39005	2	0	0.425361084
2_39039	2	0	0.425361086
2_39089	2	0	0.425361088
2_39211	2	0	0.42536109
2_39308	2	0	0.425361092
2_39363	2	0	0.425361094
2_39476	2	0	0.425361096
2_39572	2	0	0.425361098
2_39697	2	0	0.4253611
2_39703	2	0	0.425361103
2_39706	2	0	0.425361105
2_39790	2	0	0.425361107
2_39960	2	0	0.425361109
2_39961	2	0	0.425361111
2_39964	2	0	0.425361113
2_39978	2	0	0.425361115
2_40191	2	0	0.425361117
2_40193	2	0	0.42536112
2_40220	2	0	0.425361122
2_40275	2	0	0.425361124
2_40517	2	0	0.425361126
2_40541	2	0	0.425361128
2_40641	2	0	0.42536113
2_40702	2	0	0.425361132
2_40747	2	0	0.425361134
2_40889	2	0	0.425361136
2_40975	2	0	0.425361139
2_41070	2	0	0.425361141
2_41085	2	0	0.425361143
2_41092	2	0	0.425361145
2_41387	2	0	0.425361147
2_41390	2	0	0.425361149
2_41447	2	0	0.425361151
2_41490	2	0	0.425361153
2_41509	2	0	0.425361155
2_41512	2	0	0.425361158
2_41583	2	0	0.42536116
2_41718	2	0	0.425361162
2_41733	2	0	0.425361164
2_41798	2	0	0.425361166
2_41908	2	0	0.425361168
2_41922	2	0	0.42536117
2_41985	2	0	0.425361172
2_42110	2	0	0.425361175
2_42239	2	0	0.425361177
2_42271	2	0	0.425361179
2_42305	2	0	0.425361181
2_42401	2	0	0.425361183
2_42537	2	0	0.425361185
2_42623	2	0	0.425361187
2_42692	2	0	0.425361189
2_42806	2	0	0.425361191
2_42848	2	0	0.425361194
2_42950	2	0	0.425361196
2_42969	2	0	0.425361198
2_43055	2	0	0.4253612
2_43105	2	0	0.425361202
2_43319	2	0	0.425361204
2_43352	2	0	0.425361206
2_43401	2	0	0.425361208
2_43435	2	0	0.42536121
2_43541	2	0	0.425361213
2_43603	2	0	0.425361215
2_43712	2	0	0.425361217
2_43838	2	0	0.425361219
2_43901	2	0	0.425361221
2_43968	2	0	0.425361223
2_43971	2	0	0.425361225
2_44294	2	0	0.425361227
2_44309	2	0	0.42536123
2_44340	2	0	0.425361232
2_44426	2	0	0.425361234
2_44574	2	0	0.425361236
2_44576	2	0	0.425361238
2_44590	2	0	0.42536124
2_44635	2	0	0.425361242
2_44680	2	0	0.425361244
2_44825	2	0	0.425361246
2_44875	2	0	0.425361249
2_44928	2	0	0.425361251
2_45065	2	0	0.425361253
2_45073	2	0	0.425361255
2_45079	2	0	0.425361257
2_45108	2	0	0.425361259
2_45146	2	0	0.425361261
2_45233	2	0	0.425361263
2_45380	2	0	0.425361265
2_45425	2	0	0.425361268
2_45453	2	0	0.42536127
2_45572	2	0	0.425361272
2_45577	2	0	0.425361274
2_45730	2	0	0.425361276
2_45785	2	0	0.425361278
2_45871	2	0	0.42536128
2_46065	2	0	0.425361282
2_46090	2	0	0.425361285
2_46425	2	0	0.425361287
2_46508	2	0	0.425361289
2_46510	2	0	0.425361291
2_46601	2	0	0.425361293
2_46758	2	0	0.425361295
2_46961	2	0	0.425361297
2_47010	2	0	0.425361299
2_47068	2	0	0.425361301
2_47113	2	0	0.425361304
2_47156	2	0	0.425361306
2_47197	2	0	0.425361308
2_47212	2	0	0.42536131
2_47300	2	0	0.425361312
2_47319	2	0	0.425361314
2_47332	2	0	0.425361316
2_47474	2	0	0.425361318
2_47685	2	0	0.42536132
2_47820	2	0	0.425361323
2_48079	2	0	0.425361325
2_48295	2	0	0.425361327
2_48302	2	0	0.425361329
2_48320	2	0	0.425361331
2_48338	2	0	0.425361333
2_48383	2	0	0.425361335
2_48455	2	0	0.425361337
2_48607	2	0	0.42536134
2_48623	2	0	0.425361342
2_48780	2	0	0.425361344
2_48827	2	0	0.425361346
2_48858	2	0	0.425361348
2_48887	2	0	0.42536135
2_48929	2	0	0.425361352
2_48981	2	0	0.425361354
2_49031	2	0	0.425361356
2_49305	2	0	0.425361359
2_49347	2	0	0.425361361
2_49405	2	0	0.425361363
2_49511	2	0	0.425361365
2_49820	2	0	0.425361367
2_49976	2	0	0.425361369
2_49996	2	0	0.425361371
2_50116	2	0	0.425361373
2_50251	2	0	0.425361375
2_50421	2	0	0.425361378
2_50431	2	0	0.42536138
2_50460	2	0	0.425361382
2_50519	2	0	0.425361384
2_51001	2	0	0.425361386
2_51061	2	0	0.425361388
2_51177	2	0	0.42536139
2_51291	2	0	0.425361392
2_51491	2	0	0.425361395
2_51627	2	0	0.425361397
2_51665	2	0	0.425361399
2_52072	2	0	0.425361401
2_52079	2	0	0.425361403
2_52511	2	0	0.425361405
2_52789	2	0	0.425361407
2_53037	2	0	0.425361409
2_53188	2	0	0.425361411
2_53303	2	0	0.425361414
2_53409	2	0	0.425361416
2_53516	2	0	0.425361418
2_53580	2	0	0.42536142
2_53713	2	0	0.425361422
2_53749	2	0	0.425361424
2_53822	2	0	0.425361426
2_54019	2	0	0.425361428
2_54033	2	0	0.425361431
2_54060	2	0	0.425361433
2_54062	2	0	0.425361435
2_54127	2	0	0.425361437
2_54312	2	0	0.425361439
2_54314	2	0	0.425361441
2_54413	2	0	0.425361443
2_54436	2	0	0.425361445
2_54499	2	0	0.425361447
2_54506	2	0	0.42536145
2_54575	2	0	0.425361452
2_54691	2	0	0.425361454
2_54733	2	0	0.425361456
2_54736	2	0	0.425361458
2_54857	2	0	0.42536146
2_54951	2	0	0.425361462
2_55245	2	0	0.425361464
2_55318	2	0	0.425361466
2_55485	2	0	0.425361469
2_55520	2	0	0.425361471
2_55524	2	0	0.425361473
1_0719	2	0.417	0.333019923
2_01977	2	0.417	0.333019925
2_07397	2	0.417	0.333019927
2_21023	2	0.417	0.333019929
2_25316	2	0.417	0.333019931
2_25317	2	0.417	0.333019933
2_25318	2	0.417	0.333019934
2_25445	2	0.417	0.333019936
2_28807	2	0.417	0.333019938
2_28808	2	0.417	0.33301994
2_29261	2	0.417	0.333019942
2_32391	2	0.417	0.333019944
2_32883	2	0.417	0.333019946
2_33759	2	0.417	0.333019948
2_34212	2	0.417	0.33301995
2_34213	2	0.417	0.333019952
2_34409	2	0.417	0.333019954
2_37472	2	0.417	0.333019956
2_40074	2	0.417	0.333019958
2_40546	2	0.417	0.333019959
2_48715	2	0.417	0.333019961
2_50787	2	0.417	0.333019963
2_51923	2	0.417	0.333019965
2_52289	2	0.417	0.333019967
2_52519	2	0.417	0.333019969
2_38255	2	0.833	0.252572602
2_51601	2	0.833	0.252572603
2_01325	2	1.25	0.334641114
2_01786	2	1.25	0.334641116
2_02247	2	1.25	0.334641118
2_05426	2	1.25	0.33464112
2_05825	2	1.25	0.334641122
2_10391	2	1.25	0.334641124
2_10392	2	1.25	0.334641126
2_18602	2	1.25	0.334641128
2_21070	2	1.25	0.33464113
2_24252	2	1.25	0.334641132
2_24487	2	1.25	0.334641134
2_24522	2	1.25	0.334641136
2_26309	2	1.25	0.334641138
2_26745	2	1.25	0.33464114
2_27204	2	1.25	0.334641142
2_29360	2	1.25	0.334641144
2_31031	2	1.25	0.334641146
2_31836	2	1.25	0.334641148
2_31967	2	1.25	0.33464115
2_32492	2	1.25	0.334641152
2_32606	2	1.25	0.334641154
2_32674	2	1.25	0.334641156
2_35292	2	1.25	0.334641158
2_38742	2	1.25	0.33464116
2_38967	2	1.25	0.334641162
2_39556	2	1.25	0.334641164
2_39951	2	1.25	0.334641166
2_39992	2	1.25	0.334641168
2_40131	2	1.25	0.33464117
2_40160	2	1.25	0.334641172
2_40686	2	1.25	0.334641174
2_41104	2	1.25	0.334641175
2_41326	2	1.25	0.334641177
2_41369	2	1.25	0.334641179
2_41568	2	1.25	0.334641181
2_41649	2	1.25	0.334641183
2_41683	2	1.25	0.334641185
2_41776	2	1.25	0.334641187
2_41906	2	1.25	0.334641189
2_42229	2	1.25	0.334641191
2_42314	2	1.25	0.334641193
2_43360	2	1.25	0.334641195
2_44728	2	1.25	0.334641197
2_44769	2	1.25	0.334641199
2_45381	2	1.25	0.334641201
2_46016	2	1.25	0.334641203
2_46018	2	1.25	0.334641205
2_46158	2	1.25	0.334641207
2_46235	2	1.25	0.334641209
2_46593	2	1.25	0.334641211
2_46668	2	1.25	0.334641213
2_47075	2	1.25	0.334641215
2_47232	2	1.25	0.334641217
2_47248	2	1.25	0.334641219
2_47343	2	1.25	0.334641221
2_48157	2	1.25	0.334641223
2_48284	2	1.25	0.334641225
2_48444	2	1.25	0.334641227
2_48851	2	1.25	0.334641229
2_48942	2	1.25	0.334641231
2_49337	2	1.25	0.334641233
2_49593	2	1.25	0.334641235
2_49856	2	1.25	0.334641237
2_50526	2	1.25	0.334641239
2_50734	2	1.25	0.334641241
2_50740	2	1.25	0.334641243
2_52299	2	1.25	0.334641245
2_52554	2	1.25	0.334641247
2_52668	2	1.25	0.334641249
2_53641	2	1.25	0.334641251
2_54949	2	1.25	0.334641253
2_00393	2	1.667	0.231545792
2_01620	2	1.667	0.231545794
2_06526	2	1.667	0.231545795
2_07548	2	1.667	0.231545797
2_07549	2	1.667	0.231545799
2_13609	2	1.667	0.2315458
2_14035	2	1.667	0.231545802
2_14710	2	1.667	0.231545804
2_14711	2	1.667	0.231545806
2_16546	2	1.667	0.231545807
2_16547	2	1.667	0.231545809
2_17959	2	1.667	0.231545811
2_17960	2	1.667	0.231545812
2_18531	2	1.667	0.231545814
2_18805	2	1.667	0.231545816
2_21495	2	1.667	0.231545817
2_21496	2	1.667	0.231545819
2_22266	2	1.667	0.231545821
2_24600	2	1.667	0.231545823
2_24601	2	1.667	0.231545824
2_24602	2	1.667	0.231545826
2_25550	2	1.667	0.231545828
2_27293	2	1.667	0.231545829
2_27294	2	1.667	0.231545831
2_27313	2	1.667	0.231545833
2_27522	2	1.667	0.231545835
2_33771	2	1.667	0.231545836
2_36458	2	1.667	0.231545838
2_37520	2	1.667	0.23154584
2_37956	2	1.667	0.231545841
2_38274	2	1.667	0.231545843
2_38275	2	1.667	0.231545845
2_38418	2	1.667	0.231545846
2_38747	2	1.667	0.231545848
2_38748	2	1.667	0.23154585
2_39303	2	1.667	0.231545852
2_39469	2	1.667	0.231545853
2_39712	2	1.667	0.231545855
2_39767	2	1.667	0.231545857
2_40186	2	1.667	0.231545858
2_40697	2	1.667	0.23154586
2_40927	2	1.667	0.231545862
2_41088	2	1.667	0.231545864
2_41137	2	1.667	0.231545865
2_41224	2	1.667	0.231545867
2_41535	2	1.667	0.231545869
2_41892	2	1.667	0.23154587
2_41930	2	1.667	0.231545872
2_42498	2	1.667	0.231545874
2_42622	2	1.667	0.231545875
2_42745	2	1.667	0.231545877
2_42764	2	1.667	0.231545879
2_43182	2	1.667	0.231545881
2_43194	2	1.667	0.231545882
2_43483	2	1.667	0.231545884
2_43896	2	1.667	0.231545886
2_43975	2	1.667	0.231545887
2_44123	2	1.667	0.231545889
2_44921	2	1.667	0.231545891
2_45059	2	1.667	0.231545892
2_45274	2	1.667	0.231545894
2_45486	2	1.667	0.231545896
2_45510	2	1.667	0.231545898
2_45701	2	1.667	0.231545899
2_45712	2	1.667	0.231545901
2_45790	2	1.667	0.231545903
2_46136	2	1.667	0.231545904
2_46989	2	1.667	0.231545906
2_47252	2	1.667	0.231545908
2_47412	2	1.667	0.23154591
2_47420	2	1.667	0.231545911
2_47841	2	1.667	0.231545913
2_47948	2	1.667	0.231545915
2_48258	2	1.667	0.231545916
2_48279	2	1.667	0.231545918
2_48333	2	1.667	0.23154592
2_48771	2	1.667	0.231545921
2_49440	2	1.667	0.231545923
2_49443	2	1.667	0.231545925
2_49572	2	1.667	0.231545927
2_49583	2	1.667	0.231545928
2_50045	2	1.667	0.23154593
2_51053	2	1.667	0.231545932
2_51063	2	1.667	0.231545933
2_51433	2	1.667	0.231545935
2_51508	2	1.667	0.231545937
2_51580	2	1.667	0.231545938
2_51644	2	1.667	0.23154594
2_51658	2	1.667	0.231545942
2_52143	2	1.667	0.231545944
2_52567	2	1.667	0.231545945
2_52690	2	1.667	0.231545947
2_52972	2	1.667	0.231545949
2_53221	2	1.667	0.23154595
2_53532	2	1.667	0.231545952
2_53602	2	1.667	0.231545954
2_53619	2	1.667	0.231545956
2_54066	2	1.667	0.231545957
2_54339	2	1.667	0.231545959
2_54638	2	1.667	0.231545961
2_54676	2	1.667	0.231545962
2_40031	2	2.083	0.33631477
2_44581	2	2.083	0.33631477
2_53947	2	2.083	0.33631477
2_55262	2	2.083	0.33631477
2_05529	2	2.5	0.254768895
2_51848	2	2.5	0.254768895
2_17297	2	2.917	0.363382354
2_17636	2	2.917	0.363382354
2_17637	2	2.917	0.363382354
2_21282	2	2.917	0.363382354
2_39606	2	2.917	0.363382354
2_42270	2	2.917	0.363382354
2_43135	2	2.917	0.363382354
2_43913	2	2.917	0.363382354
2_50070	2	2.917	0.363382354
2_50709	2	2.917	0.363382354
2_53125	2	2.917	0.363382354
2_54359	2	2.917	0.363382354
2_55229	2	2.917	0.363382354
2_01054	2	3.757	0.363382354
2_02255	2	3.757	0.363382354
2_03027	2	3.757	0.363382354
2_06445	2	3.757	0.363382354
2_06446	2	3.757	0.363382354
2_07215	2	3.757	0.363382354
2_07216	2	3.757	0.363382354
2_09029	2	3.757	0.363382354
2_09246	2	3.757	0.363382354
2_09710	2	3.757	0.363382354
2_10217	2	3.757	0.363382354
2_10218	2	3.757	0.363382354
2_11524	2	3.757	0.363382354
2_11726	2	3.757	0.363382354
2_14516	2	3.757	0.363382354
2_14559	2	3.757	0.363382354
2_16545	2	3.757	0.363382354
2_25452	2	3.757	0.363382354
2_27450	2	3.757	0.363382354
2_29885	2	3.757	0.363382354
2_33437	2	3.757	0.363382354
2_38961	2	3.757	0.363382354
2_40314	2	3.757	0.363382354
2_40712	2	3.757	0.363382354
2_41607	2	3.757	0.363382354
2_42127	2	3.757	0.363382354
2_42577	2	3.757	0.363382354
2_42757	2	3.757	0.363382354
2_43757	2	3.757	0.363382354
2_44208	2	3.757	0.363382354
2_44555	2	3.757	0.363382354
2_46261	2	3.757	0.363382354
2_46969	2	3.757	0.363382354
2_47863	2	3.757	0.363382354
2_47909	2	3.757	0.363382354
2_47913	2	3.757	0.363382354
2_48821	2	3.757	0.363382354
2_49014	2	3.757	0.363382354
2_49259	2	3.757	0.363382354
2_50022	2	3.757	0.363382354
2_50760	2	3.757	0.363382354
2_51473	2	3.757	0.363382354
2_51944	2	3.757	0.363382354
2_52006	2	3.757	0.363382354
2_52328	2	3.757	0.363382354
2_54288	2	3.757	0.363382354
2_54861	2	3.757	0.363382354
2_18705	2	4.174	0.254768893
2_20485	2	4.174	0.254768893
2_37318	2	4.174	0.254768893
2_47594	2	4.174	0.254768893
2_53176	2	4.174	0.254768893
2_17579	2	5.014	0.254768893
2_38514	2	5.014	0.254768893
2_42358	2	5.014	0.254768893
2_17440	2	5.431	0.33631477
2_21892	2	5.431	0.33631477
2_23768	2	5.431	0.33631477
2_24266	2	5.431	0.33631477
2_24267	2	5.431	0.33631477
2_27759	2	5.431	0.33631477
2_31907	2	5.431	0.33631477
2_32532	2	5.431	0.33631477
2_39619	2	5.431	0.33631477
2_41294	2	5.431	0.33631477
2_42405	2	5.431	0.33631477
2_44604	2	5.431	0.33631477
2_46046	2	5.431	0.33631477
2_54617	2	5.431	0.33631477
2_55419	2	5.431	0.33631477
2_55550	2	5.431	0.33631477
1_1302	2	5.847	0.429924615
2_05606	2	5.847	0.429924615
2_06436	2	5.847	0.429924615
2_06437	2	5.847	0.429924615
2_21602	2	5.847	0.429924615
2_22304	2	5.847	0.429924615
2_22305	2	5.847	0.429924615
2_27989	2	5.847	0.429924615
2_27990	2	5.847	0.429924615
2_32056	2	5.847	0.429924615
2_40003	2	5.847	0.429924615
2_42202	2	5.847	0.429924615
2_46280	2	5.847	0.429924615
2_47987	2	5.847	0.429924615
2_51897	2	5.847	0.429924615
2_53841	2	5.847	0.429924615
2_15373	2	6.264	0.536002121
2_18635	2	6.264	0.536002121
2_18636	2	6.264	0.536002121
2_19171	2	6.264	0.536002121
2_29419	2	6.264	0.536002121
2_33067	2	6.264	0.536002121
2_45455	2	6.264	0.536002121
2_52920	2	6.264	0.536002121
2_54133	2	6.264	0.536002121
2_02726	2	6.681	0.401786811
2_10642	2	6.681	0.401786811
2_13369	2	6.681	0.401786811
2_22310	2	6.681	0.401786811
2_28577	2	6.681	0.401786811
2_28578	2	6.681	0.401786811
2_29400	2	6.681	0.401786811
2_34526	2	6.681	0.401786811
2_42471	2	6.681	0.401786811
2_47163	2	6.681	0.401786811
2_49586	2	6.681	0.401786811
2_02488	2	7.098	0.505409236
2_02489	2	7.098	0.505409236
2_07555	2	7.098	0.505409236
2_07556	2	7.098	0.505409236
2_09781	2	7.098	0.505409236
2_09782	2	7.098	0.505409236
2_10717	2	7.098	0.505409236
2_12074	2	7.098	0.505409236
2_12075	2	7.098	0.505409236
2_13779	2	7.098	0.505409236
2_13780	2	7.098	0.505409236
2_13915	2	7.098	0.505409236
2_14147	2	7.098	0.505409236
2_14648	2	7.098	0.505409236
2_14649	2	7.098	0.505409236
2_16499	2	7.098	0.505409236
2_23163	2	7.098	0.505409236
2_23164	2	7.098	0.505409236
2_25308	2	7.098	0.505409236
2_25610	2	7.098	0.505409236
2_25611	2	7.098	0.505409236
2_26211	2	7.098	0.505409236
2_26610	2	7.098	0.505409236
2_29663	2	7.098	0.505409236
2_30229	2	7.098	0.505409236
2_31073	2	7.098	0.505409236
2_32111	2	7.098	0.505409236
2_32890	2	7.098	0.505409236
2_33095	2	7.098	0.505409236
2_38637	2	7.098	0.505409236
2_39686	2	7.098	0.505409236
2_41998	2	7.098	0.505409236
2_42611	2	7.098	0.505409236
2_44236	2	7.098	0.505409236
2_48141	2	7.098	0.505409236
2_49018	2	7.098	0.505409236
2_49341	2	7.098	0.505409236
2_50072	2	7.098	0.505409236
2_50557	2	7.098	0.505409236
[truncated: 13,621 more rows]
